1 **TITLE**

2 Prevalence and risk factors for long COVID after mild disease: a longitudinal study with a  
3 symptomatic control group.

4

5 **AUTHORS**

6 ➤ Ana Beatriz Cazé Cerón – [ana.caze@ufba.br](mailto:ana.caze@ufba.br) - Universidade Federal da Bahia,  
7 Salvador, Bahia, Brazil

8 ➤ Thiago Cerqueira-Silva, MD - [csilvathiago@hotmail.com](mailto:csilvathiago@hotmail.com) - LIB and LEITV  
9 Laboratories, Instituto Gonçalo Moniz, Fiocruz, Salvador, Bahia, Brazil;  
10 Universidade Federal da Bahia, Salvador, Bahia, Brazil

11 ➤ Adriele Pinheiro Bomfim, M. Sc., - [adrielepbomfim@gmail.com](mailto:adrielepbomfim@gmail.com) – Instituto Gonçalo  
12 Muniz, Fiocruz, Salvador, Brazil; Universidade Federal da Bahia, Salvador, Bahia,  
13 Brazil

14 ➤ Gisley Lima de Souza - [gisleysouza19.1@bahiana.edu.br](mailto:gisleysouza19.1@bahiana.edu.br) - Escola de Medicina e  
15 Saúde Pública da Bahia; Instituto Gonçalo Moniz, Fiocruz, Salvador, Bahia, Brazil

16 ➤ Amanda Canário Andrade Azevedo, MD, M.Sc. – [amandacanario@gmail.com](mailto:amandacanario@gmail.com) -  
17 Hospital Santa Izabel, Santa Casa da Bahia, Salvador, Bahia, Brazil

18 ➤ Michelle Queiroz Aguiar Brasil, MD, M. Sc. - [michelleqas@gmail.com](mailto:michelleqas@gmail.com) - Instituto  
19 Gonçalo Moniz, Fiocruz, Salvador, Bahia, Brazil; Federal University of Bahia,  
20 Salvador, Bahia, Brazil

21 ➤ Nara Rúbia Santos - [narabusiness@hotmail.com](mailto:narabusiness@hotmail.com) - Departamento de Vigilância em  
22 Saúde/Vigilância Epidemiológica, Campo Formoso, Bahia Brazil

23 ➤ Antônio Ricardo Khouri Cunha, PhD - [ricardo\\_khouri@hotmail.com](mailto:ricardo_khouri@hotmail.com) - Department of  
24 Microbiology, Immunology and Transplantation, Rega Institute for Medical Research,  
25 Laboratory of Clinical and Epidemiological Virology, Belgium; Instituto Gonçalo  
26 Moniz, Fiocruz, Salvador, Bahia, Brazil

- 27       ➤ Jennifer Dan, MD, PhD – [jd@ucsd.edu](mailto:jd@ucsd.edu) - Center for Infectious Disease and Vaccine  
28       Research, la Jolla Institute for Immunology (LJI); Department of Medicine, Division  
29       of Infectious Disease and Global Public Health, University of California, San Diego  
30       (UCSD), La Jolla, CA 92037, USA
- 31       ➤ Antonio Carlos Bandeira, MD, PhD, – [antoniobandeira@gmail.com](mailto:antoniobandeira@gmail.com) - UNI-FTC-  
32       Faculdade Tecnologia Ciências Medical School, Bahia; Central State Laboratory  
33       LACEN-Bahia; Infectious Diseases Advisor
- 34       ➤ Luciano Pamplona de Goes Cavalcanti, MD, PhD - [pamplona.luciano@gmail.com](mailto:pamplona.luciano@gmail.com) -  
35       Universidade Federal do Ceará, Fortaleza, Ceará, Brazil; Centro Universitario  
36       Christus, Fortaleza, Ceará, Brazil
- 37       ➤ Manoel Barral-Netto, MD, PhD - [manoel.barral@fiocruz.br](mailto:manoel.barral@fiocruz.br) - LIB and LEITV  
38       Laboratories, Instituto Gonçalo Moniz, Fiocruz, Salvador, Bahia, Brazil;  
39       Universidade Federal da Bahia, Salvador, Bahia, Brazil
- 40       ➤ Aldina Maria Prado Barral - [aldina.barral@fiocruz.br](mailto:aldina.barral@fiocruz.br) - Instituto Gonçalo Moniz,  
41       Fundação Oswaldo Cruz, Salvador, Bahia, Brazil; Instituto de Investigação em  
42       Imunologia, São Paulo, São Paulo, Brazil
- 43       ➤ Cynara Gomes Barbosa\*, PhD - [cynara.barbosa@gmail.com](mailto:cynara.barbosa@gmail.com) - Universidade Federal  
44       da Bahia, Salvador, Brazil
- 45       ➤ Viviane Sampaio Boaventura de Oliveira\*, MD, PhD, - [vsboaventura@gmail.com](mailto:vsboaventura@gmail.com) -  
46       LIB and LEITV Laboratories, Instituto Gonçalo Moniz, Fiocruz, Salvador, Bahia,  
47       Brazil; Universidade Federal da Bahia, Salvador, Bahia, Brazil

48       \*Those authors equally supervised this study

49       **Corresponding author**

50       Viviane Sampaio Boaventura

51       Email address: [vsboaventura@gmail.com](mailto:vsboaventura@gmail.com)

52 Telephone: + 55 71 31762211

53 Postal address: 121 Waldemar Falcão Street, Candeal, Salvador, Bahia, Brazil, CEP 40296

54

55

56

57 **ABSTRACT**

58

59 *Background*

60 There is limited data on the prevalence and risk factors for long COVID, with a shortage of  
61 prospective studies with appropriate control groups and adequate sample size. We therefore  
62 performed a prospective study to determine the prevalence and risk factors for long COVID.

63 *Methods*

64 We recruited patients age  $\geq 15$  years who were clinically suspected of having acute SARS-  
65 CoV-2 infection from September 2020 to April 2021. Nasopharyngeal swabs were collected  
66 for RT-PCR 3-5 days post symptom onset. Clinical and sociodemographic characteristics  
67 were collected using structured questionnaires from persons positive and negative for SARS-  
68 COV-2. Follow-up was performed by telephone interview to assess early outcomes and  
69 persistent symptoms. For COVID-19 cases, 5D-3L EuroQol questionnaire was used to assess  
70 the impact of symptoms on quality of life.

71 *Results*

72 We followed 814 participants (412 COVID-19 positive and 402 COVID-19 negative persons)  
73 of whom the majority (741 / 814) had mild symptoms. Both the COVID-19 positive and the  
74 COVID-19 negative groups had similar sociodemographic and clinical characteristics, except  
75 for the rate of hospitalization (15.8% vs 1.5%, respectively). One month after disease onset,  
76 122 (29.6%) individuals reported residual symptoms in the COVID-19 positive group or the  
77 long COVID group versus 24 (6%) individuals in the COVID-19 negative group. In the long  
78 COVID group, fatigue, olfactory disorder, and myalgia were the most frequent symptoms  
79 which occurred in the acute phase. Compared to recovered patients, female sex, older age and  
80 having  $> 5$  symptoms during the acute phase were risk factors for long COVID. Quality of  
81 life was evaluated in 102 out of 122 cases of long COVID with 57 (55.9%) reporting an  
82 impact in at least one dimension of the EuroQol 5D-3L questionnaire.

83 *Conclusion*

84 In this prospective study consisting predominantly of patients with mild disease, the  
85 persistence of symptoms after acute disease was highly associated with long COVID-19  
86 (29.6% vs 6% of COVID negative group). The risk factors for long COVID were older age,  
87 female sex, and polysymptomatic acute disease.

88

89 **KEYWORDS**

90 COVID-19; SARS-CoV-2; long COVID; frequency; risk factor; outpatients; post-COVID  
91 syndrome; persistent symptoms; post-Acute COVID Syndrome; PASC.

92

93

## 94 **BACKGROUND**

95 Long COVID has received less attention from the scientific community than acute  
96 COVID-19, representing less than 2% of COVID-19 publications in PubMed Clinical  
97 Queries, August 31, 2022). Several important aspects remain undefined such as its  
98 prevalence. Long COVID has been reported to affect between 7.5% to 89% of patients [1, 2,  
99 29, 30]. Most of these studies do not include well-matched controls which is important  
100 because long COVID-symptoms are nonspecific and may be attributed to other factors such  
101 as the physical and mental impact of having COVID-19 infection or hospitalization [3,4].  
102 Prospective studies enrolling symptomatic individuals with and without confirmed COVID-  
103 19 are necessary to better estimate the prevalence of long COVID and its associated risk  
104 factors.

105 Long COVID is anticipated to have a large impact on the healthcare system [5].  
106 Identifying risk factors for developing long COVID will help mitigate its impact. Some risk  
107 factors have been suggested for long COVID; however, these studies consisted of previously  
108 hospitalized patients [1] or were retrospective analyses from electronic health records of not  
109 hospitalized patients (31). We therefore performed a longitudinal study of patients with  
110 COVID-like symptoms who tested positive or negative for SARS-CoV-2 to assess the  
111 prevalence and risk factors for long COVID and its impact on the quality of life.

112

## 113 **METHODS**

### 114 *Study population*

115 We recruited individuals age  $\geq 15$  years with clinical suspicion of acute SARS-CoV-2  
116 infection in health care units from three municipalities of Bahia State-Brazil (Irecê, Campo  
117 Formoso, and Lauro de Freitas). Individuals who had difficulty in reporting symptoms, those  
118 who were  $> 20$  days post symptom onset at the time of recruitment, or those who reported

119 SARS-CoV-2 re-infection were excluded. The study was conducted from September 2020 to  
120 April 2021. The ancestral strain or gamma variant of SARS-CoV-2 was dominant in Brazil  
121 from November 2020 to August 2021 (**Additional file 1: Fig S1-2**) [6].

122

### 123 *Exposure measurement*

124 All patients were tested for COVID-19 by nasopharyngeal RT-PCR. Only individuals  
125 who had an RT-PCR in the first ten days of disease onset were considered eligible for the  
126 follow-up. The Strengthening the Reporting of Observational Studies in Epidemiology  
127 (STROBE) protocol was followed.

128

### 129 *Recruitment strategy and data collected*

130 Consecutive in-person recruitment included the application of a structured survey  
131 (Questionnaire 1) using Research Electronic Data Capture (REDCap) software hosted by the  
132 Gonçalo Moniz Institute (IGM/FIOCRUZ) in Bahia, Brazil. The following information was  
133 collected: sociodemographic characteristics (age, gender, skin color, body mass index,  
134 anthropometric data, municipality of residence), comorbidities (hypertension, diabetes, heart  
135 disease, chronic lung disease, other), date of symptom onset, acute symptoms (fever,  
136 myalgias, arthralgias, cough, shortness of breath, nasal congestion, sneezing, coryza, sore  
137 throat, sinus pain, retroocular pain, ear pain, headache, chest pain, chest discomfort, rash,  
138 abdominal pain, loss of appetite, vomiting, diarrhea (2 or more episodes in the last 24 hours),  
139 weakness, fatigue, lightheadedness or fainting, loss of smell, and loss of taste).

140

### 141 *Follow-up and outcome measurement*

142 SARS-CoV-2 positive (COVID-19) and negative (non-COVID-19) patients who  
143 reported COVID-like symptoms were followed. Negative cases were recruited on the same

144 day as positive cases before nasopharyngeal RT-PCR. The date of symptom onset was  
145 considered Day zero. A second structured questionnaire (Questionnaire 2) was conducted 30  
146 to 60 days after disease onset by telephone to document the RT-PCR result, acute symptoms,  
147 and clinical outcome. Participants were classified as non-hospitalized or hospitalized in the  
148 intensive care unit (ICU) or non-ICU). To avoid memory bias, questionnaires 1 and 2 were  
149 applied in a short interval of time.

150 A third structured questionnaire was conducted 60 to 250 days after disease onset by  
151 telephone to evaluate residual symptoms (Questionnaire 3). Questions included residual or  
152 new symptoms: cough, fatigue, shortness of breath, headache, chest pain, dysphonia,  
153 dysphagia, loss of appetite, loss of smell, loss of taste, myalgias, arthralgias, fever, and other  
154 non-listed symptoms. Patients reporting suspected or confirmed re-infection were excluded  
155 from the final analysis. A schematic diagram of the study is provided (**Additional file 1: Fig**  
156 **S3**).

157

### 158 *Outcomes of interest*

159 Long COVID was defined according to the Centers for Disease Control and  
160 Prevention classification [7]. Persistence of symptoms was defined as the presence of at least  
161 one residual symptom > 1 month post disease onset. The list of residual symptoms presented  
162 on the questionnaire was based on literature [8,9].

163 The European Quality of Life 5 Dimensions 3 Level (EQ-5D-3L) was conducted via  
164 telephone to assess health dimensions: mobility, self-care, daily activities, pain/discomfort  
165 and anxiety/depression. The EQ-visual analogue scale (VAS) was also conducted with 0  
166 rated as worst health imaginable and 100 as the best imaginable health [10].

167

### 168 *Statistical analysis*



169 Categorical data were described using absolute values and percentages/frequencies.  
170 Continuous data were described using mean (standard deviation, SD) and median  
171 (interquartile range, IQR). The correlation matrix was constructed based on the frequency of  
172 persistent symptoms reported by the patients. Multivariable logistic regression was performed  
173 to explore risk factors related to long COVID, applying the odds ratios (OR; 95% CI).  
174 Analyses were done in R (version 4.2.0) [26].

175

## 176 **RESULTS**

177 In total, 1,268 patients with suspected SARS-CoV-2 infection were recruited and  
178 answered the first questionnaire 4 days (range of 3-5 days) post symptom onset. After  
179 excluding cases outside the RT-PCR recommended window period, reported re-infection, or  
180 those lost to follow-up, 814 (64.2%) patients were considered eligible for the analysis of  
181 residual symptoms (**Fig. 1, Additional file 1: Fig. S3**). Questionnaires 2 and 3 were  
182 conducted 40 (31-59) days and 102 (63-150) days post symptom onset, respectively. No  
183 difference in sociodemographic data and frequency of positive RT-PCR were observed  
184 between the included (n=814) and excluded (n=454) participants (**Additional file 1: Table**  
185 **S1**). Among the included participants, 412 tested positive (COVID-19 group) and 402 tested  
186 negative (non-COVID-19 group) for SARS-CoV-2. Demographic characteristics for the  
187 COVID and non-COVID groups were as follows, respectively: a median age of 36 (IQR) and  
188 34 (IQR) years, female gender of 55% and 64%, mild disease in 84% and 99% (**Table 1**).  
189 More patients were hospitalized in the COVID-19 group compared to the non-COVID-19  
190 group (15.9% vs 1.5%, respectively, **Table 1**). Follow-up time was 3.3 months for the  
191 COVID group and 3.7 months for the non-COVID group (**Additional file 1: Fig. S4**).

192 After one month post disease onset, per the CDC definition for long COVID  
193 (September 16, 2021), 122/412 (29.6%) individuals from the COVID group reported residual

194 symptoms and were classified as long COVID cases, while the remaining 290 individuals  
195 were fully recovered. From the non-COVID group, residual symptoms were reported by only  
196 24 (6%) individuals (**Table 1**). Among long COVID cases, 57 (13.2%) presented with more  
197 than two residual symptoms.

198         Within the COVID group, fatigue (56, 13.7%), olfactory disorder (42, 9.9%), myalgia  
199 (36, 8.7%), gustatory disorder (27, 6.6%), and headache (26, 6.1%) were the residual  
200 symptoms most frequently reported (**Fig. 2**). These symptoms started mainly during the acute  
201 phase. Other symptoms not reported during the acute phase, such as memory loss and hair  
202 loss, were reported by the patients with long COVID (**Additional file 1: Table S2**).  
203 Compared to those who recovered, the long COVID group had more women (63.1% vs.  
204 52.1%) and older individuals [40 (32-51) vs. 35 (28-47) years] (**Table 2**). Hospitalization for  
205 acute disease was comparable between long COVID (21/122, 17.2%) and recovered patients  
206 (44/290, 15.2%).

207         The risk of long COVID increased with age and was significant for persons 50 years  
208 of age or older (OR 2.44, 95% CI 1.29-4.66). Individuals with > five symptoms in the acute  
209 phase (OR 3.15, 95% CI 1.37-8.55) and females (OR 1.55, 95% CI 0.99-2.44) were more  
210 likely to develop long COVID (**Table 3**).

211         Co-occurrence of long COVID symptoms was also observed. Fatigue was reported by  
212 at least 50% of those that complained of gustatory dysfunction, anorexia, dysphonia, chest  
213 pain, headache, breathlessness, or myalgia. Moreover, olfactory dysfunction was reported by  
214 80% of participants with gustatory dysfunction (**Additional file 1: Fig. S5**).

215         Finally, we have evaluated the impact of long COVID on the quality of life. The EQ-  
216 5D-3L questionnaire was administered to 102 out of 122 patients. Fifty-seven patients  
217 (55.8%) reported alteration in at least one dimension of QoL, and 41 patients (41.1%) had an  
218 impact in the dimension of pain and depression (**Additional file 1: Table S3**).

219

## 220 **DISCUSSION**

221 We have followed RT-PCR positive and negative patients with COVID-like  
222 symptoms from the first days post symptom onset to 63-150 days post symptom onset to  
223 determine the prevalence of long COVID-19. Long COVID occurred in almost one-third of  
224 test-positive cases, the majority with mild acute disease, compared to 6% of negative patients  
225 with residual symptoms, supporting the association between SARS-CoV-2 infection and  
226 residual symptoms. The risk of long COVID increased with age > 50 years old, female  
227 gender, and the development of > five symptoms during the acute phase. Together these  
228 findings demonstrate that residual symptoms after mild disease were mainly associated with  
229 COVID-19 with well-defined demographic and clinical risk factors.

230 The proportion of patients with COVID-19 who developed long COVID has varied  
231 from 7.5% to 89% [1, 2, 29, 30]. Most studies only included patients who tested positive for  
232 SARS-CoV-2. One strength of our study is the inclusion of a comparator group of  
233 symptomatic patients, recruited in the same time/location, who tested negative by SARS-  
234 CoV-2 RT-PCR. Additionally, most symptoms investigated in the follow-up questionnaires  
235 were evaluated at the time of recruitment, in a blinded manner, prior to the SARS-CoV-2 test  
236 result. The inclusion of a control group is important considering that many residual  
237 symptoms attributed to long COVID, such as fatigue and headache, are nonspecific and could  
238 be triggered or aggravated by stress and psychosocial problems connected to the global health  
239 crisis [11-13]. Indeed, we observed that non-confirmed COVID-19 cases reported similar  
240 residual symptoms after acute illness, albeit at a much lower frequency. Few studies have  
241 included a control group composed of symptomatic patients that tested negative for SARS-  
242 CoV-2 [14, 31]. In a cohort of healthcare workers, olfactory disorders and hair loss were  
243 related to long COVID while positive and negative cases both had similar frequencies of

244 exhaustion/burnout and fatigue [14]. In a population-based digital retrospective cohort  
245 including outpatients and well-matched controls, 62 symptoms were associated with long  
246 COVID [31]. The inclusion of a control group is even more valuable for hospitalized cases,  
247 considering the increased risk of sequelae associated with iatrogenic procedures for treating  
248 severe disease [15]. Together, these findings highlight the importance of including a control  
249 group when determining the frequency of sequelae to avoid overestimating long COVID  
250 cases.

251 We observed a similar proportion of long COVID in groups with mild and  
252 moderate/severe disease [16,17]. We enrolled a small number of severe COVID-19 cases and  
253 therefore could not conclude an association between disease severity and sequelae. Severe  
254 COVID-19 increases the risk of long COVID by 1.2 to 8x among hospitalized cases  
255 compared to those not hospitalized [18]. Nonetheless, the finding that long COVID occurs in  
256 a significant proportion of individuals after mild disease highlights its potential impact on the  
257 healthcare system, as COVID-19 variants and sub-variants continue to spread worldwide.

258 Fatigue was the most frequent sequelae and occurred isolated or associated with other  
259 clinical manifestations. As previously reported [19], we also observed a vast impact of long  
260 COVID on the quality of life. Although the mechanism is unknown, an exacerbation of the  
261 immunological response and multisystemic involvement [20] seems to be involved. Studies  
262 investigating the pathogenesis of long COVID are essential to improve treatment and  
263 attenuate the impact.

264 Similar to previous studies [3, 9, 17, 21-23, 31], we found that long COVID was more  
265 prevalent in women and could be attributed to a greater propensity for women to go to a  
266 clinic [22]. Indeed, females represented 55% of the COVID group and 64% of the non-  
267 COVID group in our study. Sex hormone differences in immune response [24] and  
268 autoimmunity triggered by SARS-CoV-2 have been suggested to be involved in the disease

269 pathogenesis of long COVID [23]. Other studies have found that individuals with more  
270 symptoms during the acute phase were at a higher risk for developing long COVID [9, 14].  
271 There are conflicting results regarding age in the risk for developing long COVID. In a  
272 cohort of healthcare workers in Switzerland, the majority of whom had mild disease, young  
273 age was associated with a higher risk for developing long COVID (14), in contrast to our  
274 findings. Additional prospective studies including multicenter cohorts with larger sample  
275 sizes and older patients should be performed to evaluate if the risk for developing long  
276 COVID differs among age groups, racial groups, and ethnicities. Prospective studies to  
277 develop predictive models and algorithms should be performed for the early detection of long  
278 COVID cases.

279 Long COVID has different definitions. We have used the CDC's definition for long  
280 COVID (September 16, 2021), that includes persistence of symptoms after four weeks of the  
281 onset of disease. Recently, a WHO-coordinated Delphi consensus established a period of  
282 more than three months after COVID-19 onset for the case definition of long COVID [25]. In  
283 our study, only 445 of the calls were performed three months after disease onset. By this  
284 definition, long COVID was detected in 68/216 (31.5%) of our patients. Residual symptoms  
285 were also observed in 17/229 (7.4%) of the non-COVID-19 patients. As observed in our  
286 study, the prevalence of long COVID may vary between studies in the absence of a universal  
287 consensus to define long COVID [4]. This impacts the estimation of the prevalence of long  
288 COVID cases worldwide.

289 This study has some limitations. The loss to follow-up was around 36% of patients  
290 and may have influenced the estimates of residual symptoms. Similar demographic and  
291 clinical characteristics were observed among patients that were included and the ones that  
292 were lost to follow-up. In addition, most participants were young, with mild disease, which  
293 does not permit generalizing these findings to the elderly and those with severe disease.

294 Moreover, the participants were aware of their diagnosis of COVID-19 when questionnaire 3  
295 was applied, which may have led to an overestimation of persistent symptoms. Finally, the  
296 short time to follow-up did not allow for an analysis of the duration of long COVID.

## 297 **CONCLUSIONS**

298 Long COVID was detected in 29.6% of patients with mild COVID-19 disease, with  
299 older age, female sex, and polysymptomatic acute disease as the main risk factors for  
300 persistent symptoms. Estimating the long COVID prevalence is important for preparing the  
301 healthcare system to assist and guide these patients. Further studies should be conducted to  
302 evaluate the impact of different variants of SARS-CoV-2 on long COVID and the potential  
303 impact of vaccines in reducing residual symptoms.

304

## 305 **LIST OF ABBREVIATIONS**

306 STROBE – Strengthening the Reporting of Observational Studies in Epidemiology

307 RT-PCR – Reverse Transcriptase Polymerase Chain Reaction

308 REDCap – Research Electronic Data Capture software

309 IGM/FIOCRUZ – Gonçalo Moniz Institute

310 ICU – Intensive Care Unit

311 SD – Standard Deviation

312 IQR – Interquartile Range

313

314 **TABLES**

315 **Table 1:** Clinical, sociodemographic characteristics and frequency of residual symptoms for  
316 COVID-19 and non-COVID-19 cases.

| Characteristic <sup>1</sup>     | COVID-19 cases<br>n = 412 | Non-COVID-19 cases<br>n = 402 |
|---------------------------------|---------------------------|-------------------------------|
| <b>Age</b>                      | 36 (28-48)                | 34(25-43)                     |
| <b>Age group</b>                |                           |                               |
| 15-29                           | 126 (30.6%)               | 167 (41.5%)                   |
| 30-39                           | 123 (29.9%)               | 106 (26.4%)                   |
| 40-49                           | 75 (18.2%)                | 82 (20.4%)                    |
| >50                             | 88 (21.4%)                | 47 (11.7%)                    |
| <b>Female sex</b>               | 228 (55.3%)               | 259 (64.4%)                   |
| <b>Body mass index (BMI)</b>    | 27 (23.5-29.8)            | 26.1 (23.5-29.1)              |
| <b>Number of acute symptoms</b> | 11 (8-14)                 | 10 (7-13)                     |
| <b>Comorbidities</b>            | 148 (35.9%)               | 131 (32.5%)                   |
| <b>Diabetes mellitus</b>        | 12 (11.0%)                | 11 (2.7%)                     |
| <b>Respiratory allergy</b>      | 95 (23.3% )               | 126 (31.3% )                  |
| <b>Obesity</b>                  | 102 (24.8%)               | 86 (21.4%)                    |
| Normal                          | 310 (75.2%)               | 316 (78.6%)                   |

317

|                                             |                |                |
|---------------------------------------------|----------------|----------------|
| Obese (BMI 30-34)                           | 21 (5.1%)      | 17 (4.2%)      |
| Overweight (BMI 35-39)                      | 79 (19.2%)     | 67 (16.7%)     |
| Extremely obese (BMI >40)                   | 2 (0.5%)       | 2 (0.5%)       |
| <b>Number of comorbidities</b>              |                |                |
| 1                                           | 101 (24.5%)    | 90 (22.4%)     |
| >1                                          | 47 (11.4%)     | 41 (10.2%)     |
| <b>Type of Hospitalization</b>              |                |                |
| Outpatient (mild)                           | 346 (84.2%)    | 395 (98.5%)    |
| Hospitalization non-ICU (moderate)          | 59 (14.4%)     | 6 (1.5%)       |
| Hospitalization ICU (severe)                | 6 (1.5%)       | 0 (0%)         |
| <b>At least one residual symptom</b>        |                |                |
| > 1 month after disease onset               | 122 (29.6%)    | 24 (5.8%)      |
| <b>Number of residual symptoms (median)</b> |                |                |
| 1                                           | 65 (15.8%)     | 9 (2.2%)       |
| >1                                          | 57 (13.2%)     | 13 (5.4%)      |
| Call Time Persistent Symptoms               | 3.35 (2.1-5.2) | 3.65 (2.1-4.9) |

318 <sup>1</sup>n(%) or Median (IQR)

319



320 **Table 2:** Clinical, sociodemographic characteristics and frequency of residual symptoms for  
321 COVID cases with or without sequelae.

| Characteristic <sup>1</sup>     | No Sequelae<br>n=290 | Sequelae<br>n=122 |
|---------------------------------|----------------------|-------------------|
| <b>Age</b>                      | 35 (28, 47)          | 40 (32, 51)       |
| <b>Age group</b>                |                      |                   |
| 15-29                           | 99 (34.1%)           | 27 (22.1%)        |
| 30-39                           | 85 (29.3%)           | 38 (31.1%)        |
| 40-49                           | 51 (17.9%)           | 24 (19.7%)        |
| >50                             | 55 (19.0%)           | 33 (27.0%)        |
| <b>Female sex</b>               | 151 (52.1%)          | 77 (63.1%)        |
| <b>BMI</b>                      | 26.9 (23.5, 29.7)    | 27.2 (23.8, 30.1) |
| <b>Number of acute symptoms</b> | 11 (7, 14)           | 12 (9, 15)        |
| <b>Comorbidities</b>            | 101 (34.8%)          | 47 (38.5%)        |
| <b>Diabetes mellitus</b>        | 6 (2.1%)             | 6 (2.1%)          |
| <b>Respiratory allergy</b>      | 63 (21.9%)           | 32 (26.2%)        |
| <b>Obesity</b>                  | 70 (24.1%)           | 32 (26.2%)        |
| Obese (BMI 30-34)               | 12 (4.1%)            | 9 (7.4%)          |
| Overweight (BMI 35-39)          | 57 (19.7%)           | 22 (18.0%)        |

---

|                           |          |          |
|---------------------------|----------|----------|
| Extremely obese (BMI >40) | 1 (0.3%) | 1 (0.3%) |
|---------------------------|----------|----------|

---

|                                |  |  |
|--------------------------------|--|--|
| <b>Number of comorbidities</b> |  |  |
|--------------------------------|--|--|

---

|   |            |            |
|---|------------|------------|
| 1 | 75 (25.9%) | 26 (21.3%) |
|---|------------|------------|

---

|    |           |            |
|----|-----------|------------|
| >1 | 26 (9.0%) | 21 (17.2%) |
|----|-----------|------------|

---

|                              |                   |                   |
|------------------------------|-------------------|-------------------|
| <b>Time of disease onset</b> | 3.30 (2.00, 5.10) | 3.75 (2.12, 5.55) |
|------------------------------|-------------------|-------------------|

---

|                        |            |            |
|------------------------|------------|------------|
| <b>Hospitalization</b> | 44 (15.2%) | 21 (17.2%) |
|------------------------|------------|------------|

---

1. n(%) or Median (IQR)

322

323

324

325 **Table 3.** Multivariable analysis of odds ratio (lower and upper confidence intervals) for  
326 presenting long COVID symptoms.

|                                          | OR   | LCI* | UCI* | P value |
|------------------------------------------|------|------|------|---------|
| <b>Age group (reference 14-29 years)</b> |      |      |      |         |
| 30-39                                    | 1.71 | 0.95 | 3.12 | 0.078   |
| 40-49                                    | 2.04 | 1.02 | 4.10 | 0.045   |
| ≥ 50                                     | 2.44 | 1.29 | 4.66 | 0.006   |
| <b>Female sex</b>                        | 1.55 | 0.99 | 2.44 | 0.055   |
| <b>&gt; 5 acute symptoms</b>             | 3.15 | 1.37 | 8.55 | 0.012   |

\*LCI and UCI - lower and upper confidence intervals, respectively

327

328 **FIGURES**

329 **Fig 1.** Flowchart of the study population.

330

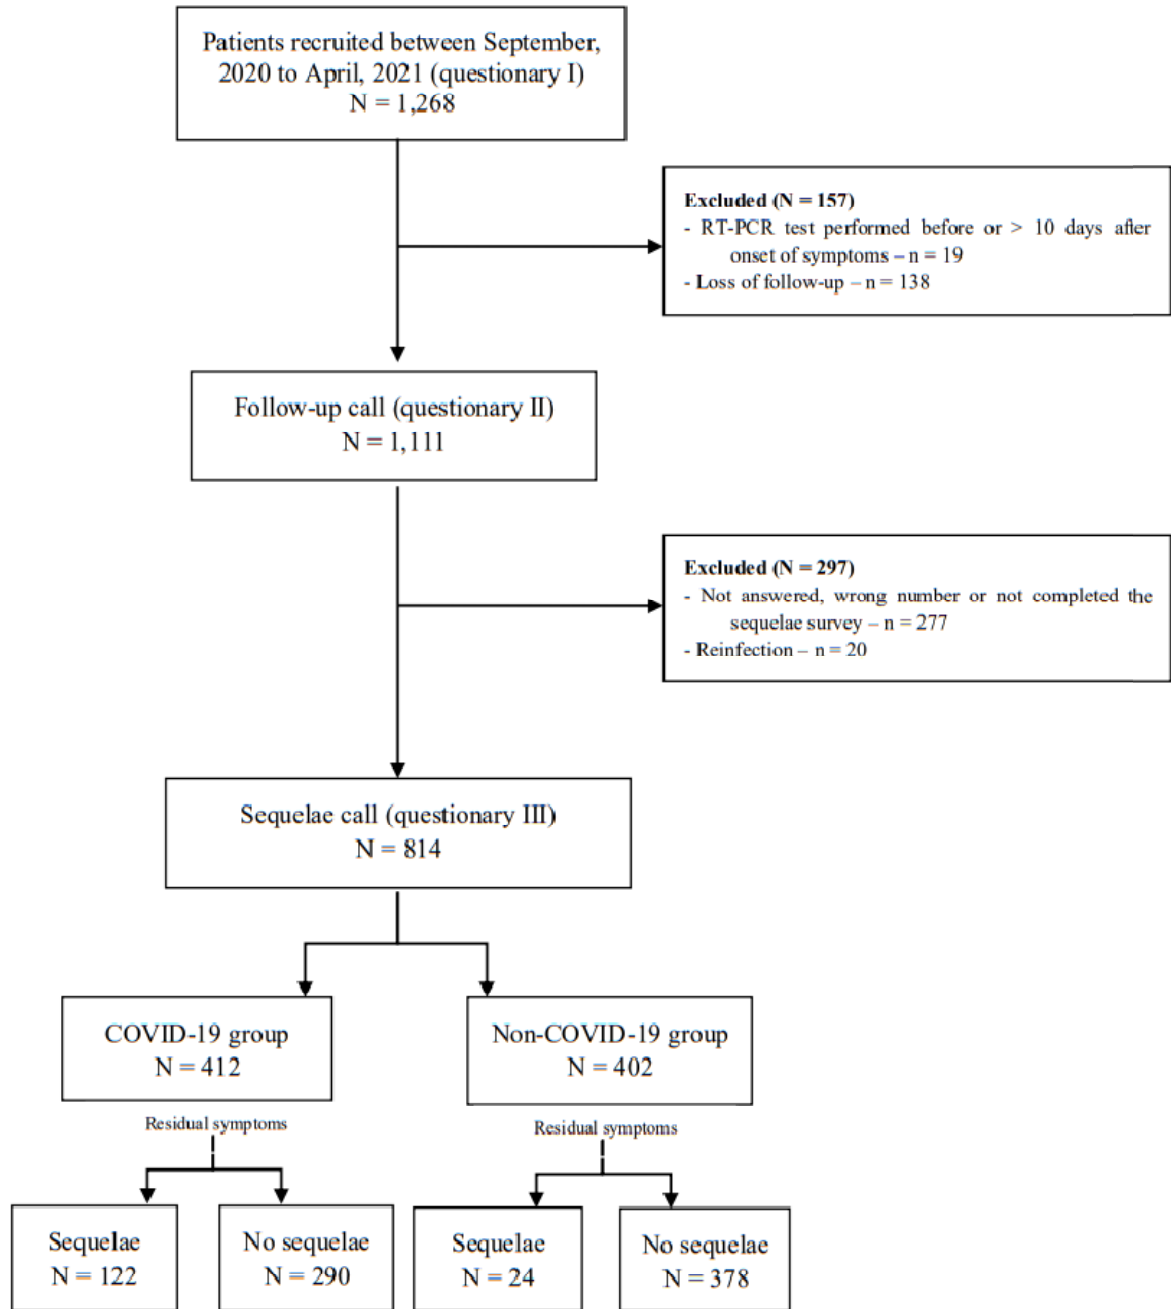

331

332

333

334 **Fig. 2:** Frequency of acute and residual symptoms for COVID-19 and non-COVID-19 cases.

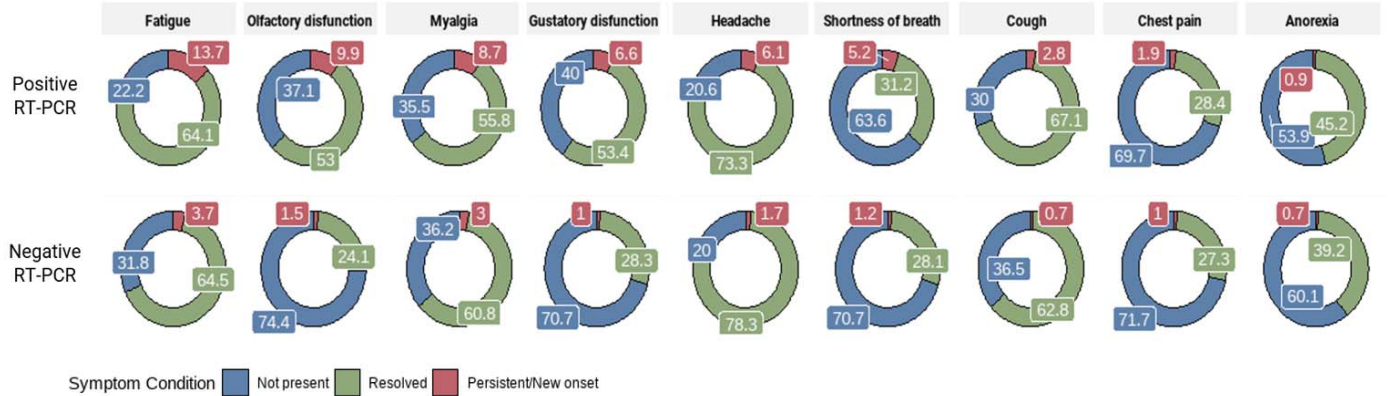

335

## 336 **DECLARATIONS**

337 **Ethics approval and consent to participate:** Informed consent was obtained from all  
338 participants. The Ethics in Research Committee of the Gonçalo Moniz Research Center  
339 approved this study (approval no. 4.315.319/202).

340 **Consent for publication:** Not applicable

341 **Availability of data and materials:** The dataset generated and/or analyzed during the  
342 current study are not publicly available due to legal and ethical restrictions. Dataset are  
343 available upon request.

344 **Funding:** This study was supported by MCTI/CNPq/FNDCT/MS/SCTIE/Decit (n° 07/2020)  
345 MB-N, AB and VSB are research fellows from CNPq, the Brazilian National Research  
346 Council. T.C-S. is a PhD student at the Post-Graduation Program in Health Sciences-UFBA,  
347 which is supported by the Coordenação de Aperfeiçoamento de Pessoal de Nível Superior-  
348 Brasil, finance code 001.

349 **Competing interests:** The authors do not have conflicts of interests to declare for this work.

350 **Authors' contributions:** A.B.C.C. and V.B structured the original draft. V.B. and C.B. were  
351 responsible for conceptualization and methodology. A.P.B., G.L.S, A.C.A.A, M.Q.A.B,  
352 N.R.S and A.B.C.C collected data from the patients. T.C.S made the formal analysis

353 statistics. A.M.P.B. and V.B. participated in the project administration and in the funding  
354 acquisition. TCS, JD, ACB, LPGC, MBN, ABN, CGB substantively revised the manuscript.  
355 All authors read and approved the final manuscript.

356 **Acknowledgements:** We wish to thank all patients who were willing to participate in the  
357 study. In addition, we would like to thank Hospital Aeroporto and Municipal Health  
358 Secretariats of Irecê and Campo Formoso for logistical support and to Roberta de Carvalho  
359 Freitas for patient-related support.

360  
361

## 362 REFERENCES

363 [1] Chen C, Hauptert SR, Zimmermann L, Shi X, Fritsche LG, Mukherjee B. Global  
364 Prevalence of Post-Coronavirus Disease 2019 (COVID-19) Condition or Long COVID: A  
365 Meta-Analysis and Systematic Review. *J Infect Dis* 2022.  
366 <https://doi.org/10.1093/infdis/jiac136>.

367 [2] Nasserie T, Hittle M, Goodman SN. Assessment of the Frequency and Variety of  
368 Persistent Symptoms Among Patients With COVID-19: A Systematic Review. *JAMA Netw*  
369 *Open* 2021;4:e2111417–e2111417.  
370 <https://doi.org/10.1001/JAMANETWORKOPEN.2021.11417>.

371 [3] Amin-Chowdhury Z, Ladhani SN. Causation or confounding: why controls are critical for  
372 characterizing long COVID. *Nat Med* 2021; 27:1129–30. [https://doi.org/10.1038/s41591-](https://doi.org/10.1038/s41591-021-01402-w)  
373 [021-01402-w](https://doi.org/10.1038/s41591-021-01402-w).

374 [4] Alkodaymi MS, Omrani OA, Fawzy NA, Shaar BA, Almamlouk R, Riaz M, et al.  
375 Prevalence of post-acute COVID-19 syndrome symptoms at different follow-up periods: a  
376 systematic review and meta-analysis. *Clin Microbiol Infect* 2022.  
377 <https://doi.org/10.1016/j.cmi.2022.01.014>.

- 378 [5] Kelly BD, Gulati G, Kelly B. Long COVID: the elephant in the room n.d.  
379 <https://doi.org/10.1093/qjmed/hcab299>. Accessed Apr 15, 2022.
- 380 [6] Nagib W. Home [Internet]. Genomahcov - Fiocruz. Available from:  
381 <http://www.genomahcov.fiocruz.br/>. Accessed Apr 5, 2022.
- 382 [7] CDC. COVID-19 and Your Health [Internet]. Centers for Disease Control and Prevention.  
383 2020. Available from: <https://www.cdc.gov/coronavirus/2019-ncov/long-term-effects/>.  
384 Accessed May 5, 2022.
- 385 [8] Lopez-Leon S, Wegman-Ostrosky T, Perelman C, Sepulveda R, Rebolledo PA, Cuapio A,  
386 et al. More than 50 long-term effects of COVID-19: a systematic review and meta-analysis.  
387 Sci Reports | 123AD;11:16144. <https://doi.org/10.1038/s41598-021-95565-8>.
- 388 [9] Sudre CH, Murray B, Varsavsky T, Graham MS, Penfold RS, Bowyer RC, et al.  
389 Attributes and predictors of long COVID. Nat Med 2021 274 2021;27:626–31.  
390 <https://doi.org/10.1038/s41591-021-01292-y>.
- 391 [10] EQ-5D User Guides – EQ-5D [Internet]. EuroQol. 2022. Available from:  
392 <https://euroqol.org/publications/user-guides/>. Accessed Apr 10, 2022.
- 393 [11] Bartoszek A, Walkowiak D, Bartoszek A, Kardas G. Mental well-being (Depression,  
394 loneliness, insomnia, daily life fatigue) during COVID-19 related home-confinement—A  
395 study from Poland. Int J Environ Res Public Health 2020;17:1–12.  
396 <https://doi.org/10.3390/ijerph17207417>.
- 397 [12] Usher K, Bhullar N, Jackson D. Life in the pandemic: Social isolation and mental health.  
398 J Clin Nurs 2020;29:2756–7. <https://doi.org/10.1111/JOCN.15290>.
- 399 [13] Brooks SK, Webster RK, Smith LE, Woodland L, Wessely S, Greenberg N, et al. Rapid  
400 Review The psychological impact of quarantine and how to reduce it: rapid review of the  
401 evidence. WwwTheLancetCom 2020;395. [https://doi.org/10.1016/S0140-6736\(20\)30460-8](https://doi.org/10.1016/S0140-6736(20)30460-8).

- 402 [14] Strahm C, Seneghini M, Güsewell S, Egger T, Leal O, Brucher A, et al. Symptoms  
403 compatible with long-COVID in healthcare workers with and without SARS-CoV-2 infection  
404 – results of a prospective multicenter cohort. *Clinical Infectious Diseases*. 2022 Jan 28.  
405 <https://doi.org/10.1093/cid/ciac054>
- 406 [15] Evans RA, Leavy OC, Richardson M, Elneima O, McCauley HJC, Shikotra A, et al.  
407 Clinical characteristics with inflammation profiling of long COVID and association with 1-  
408 year recovery following hospitalisation in the UK: a prospective observational study. *Lancet*  
409 *Respir Med* 2022;0. [https://doi.org/10.1016/S2213-2600\(22\)00127-8/](https://doi.org/10.1016/S2213-2600(22)00127-8/)
- 410 [16] Townsend L, Dyer AH, Jones K, Dunne J, Mooney A, Gaffney F, et al. Persistent  
411 fatigue following SARS-CoV-2 infection is common and independent of severity of initial  
412 infection. *PLoS One* 2020;15: e0240784. <https://doi.org/10.1371/JOURNAL.PONE.0240784>.
- 413 [17] Bai F, Tomasoni D, Falcinella C, Barbanotti D, Castoldi R, Mul G, et al. Female gender  
414 is associated with long COVID syndrome: a prospective cohort study. *Clin Microbiol Infect*  
415 2021;•:1. <https://doi.org/10.1016/j.cmi.2021.11.002>.
- 416 [18] Peghin M, Palese A, Venturini M, De Martino M, Gerussi V, Graziano E, et al. Post-  
417 COVID-19 symptoms 6 months after acute infection among hospitalized and non-  
418 hospitalized patients. *Clin Microbiol Infect* 2021;27:1507–13.  
419 <https://doi.org/10.1016/j.cmi.2021.05.033>.
- 420 [19] Kim Y, Kim S-W, Chang H-H, Kwon KT, Hwang S, Bae S. One Year Follow-Up of  
421 COVID-19 Related Symptoms and Patient Quality of Life: A Prospective Cohort Study.  
422 *Yonsei Med J* 2022;63:499–510. <https://doi.org/10.3349/YMJ.2022.63.6.499>.
- 423 [20] Abboud H, Abboud FZ, Kharbouch H, Arkha Y, El Abbadi N, El Ouahabi A. COVID-  
424 19 and SARS-Cov-2 Infection: Pathophysiology and Clinical Effects on the Nervous System.  
425 *World Neurosurg* 2020;140:49–53. <https://doi.org/10.1016/J.WNEU.2020.05.193>.



- 426 [21] Petersen MS, Kristiansen MF, Hanusson KD, Danielsen ME, á Steig B, Gaini S, et al.  
427 Long COVID in the Faroe Islands: A Longitudinal Study Among Nonhospitalized Patients.  
428 Clin Infect Dis 2021;73:e4058–63. <https://doi.org/10.1093/cid/ciaa1792>.
- 429 [22] Augustin M, Schommers P, Stecher M, Dewald F, Gieselmann L, Gruell H, et al. Post-  
430 COVID syndrome in non-hospitalised patients with COVID-19: a longitudinal prospective  
431 cohort study. Lancet Reg Heal - Eur 2021;6:100122.  
432 <https://doi.org/10.1016/j.lanep.2021.100122>.
- 433 [23] Seeßle J, Waterboer T, Hippchen T, Simon J, Kirchner M, Lim A, et al. Persistent  
434 Symptoms in Adult Patients 1 Year After Coronavirus Disease 2019 (COVID-19): A  
435 Prospective Cohort Study. Clin Infect Dis 2022;74:1191–8.  
436 <https://doi.org/10.1093/cid/ciab611>.
- 437 [24] Stewart S, Newson L, Briggs TA, Grammatopoulos D, Young L, Gill P. Long COVID  
438 risk - a signal to address sex hormones and women’s health. Lancet Reg Heal - Eur 2021;11.  
439 <https://doi.org/10.1016/J.LANEPE.2021.100242>.
- 440 [25] Soriano JB, Murthy S, Marshall JC, Relan P, Diaz J V. A clinical case definition of  
441 post-COVID-19 condition by a Delphi consensus. Lancet Infect Dis 2021.  
442 [https://doi.org/10.1016/s1473-3099\(21\)00703-9](https://doi.org/10.1016/s1473-3099(21)00703-9).
- 443 [26] R Core Team (2021). R: A language and environment for statistical computing. R  
444 Foundation for Statistical Computing, Vienna, Austria. URL <https://www.R-project.org/>.
- 445 [27] Rede Genômica Fiocruz. <https://www.genomahcov.fiocruz.br/>. Accessed May 5, 2022.
- 446 [28] BioRender. <https://biorender.com/>. Accessed May 6, 2022.
- 447 [29] Office for National Statistics. The prevalence of long COVID symptoms and COVID-19  
448 complications. 2020. Available from: [https://www.ons.gov.uk/news/statementsandletters/  
449 theprevalenceofongcovidsymptomsandcovid19complications](https://www.ons.gov.uk/news/statementsandletters/the-prevalence-of-long-covid-symptoms-and-covid-19-complications). Accessed May 20, 2022.

450 [30] CDC. Nearly One in Five American Adults Who Have Had COVID-19 Still Have “Long  
451 COVID” [Internet]. Centers for Disease Control and Prevention. 2022. Available from:  
452 [https://www.cdc.gov/nchs/pressroom/nchs\\_press\\_releases/2022/20220622.htm#:~:text=Over](https://www.cdc.gov/nchs/pressroom/nchs_press_releases/2022/20220622.htm#:~:text=Over)  
453 [all%2C%201%20in%2013%20adults,long%20COVID%20than%20younger%20adults.](https://www.cdc.gov/nchs/pressroom/nchs_press_releases/2022/20220622.htm#:~:text=Over)  
454 Accessed May 21, 2022.

455 [31] Subramanian A, Nirantharakumar K, Hughes S, Myles P, Williams T, Gokhale KM,  
456 Taverner T, Chandan JS, Brown K, Simms-Williams N, Shah AD. Symptoms and risk factors  
457 for long COVID in non-hospitalized adults. *Nature Medicine*. 2022 Jul 25:1-9.
